# Supplementary material for: Effect of Trichoderma asperellum on Wheat Plants’ Biochemical and Molecular Responses, and Yield under Different Water Stress Conditions
Source: MDPI journal article supplement (doi:10.3390/ijms23126782), 2022-06-17
Supplement: s1 [file s1]

**Table S1.** Measurements of macro- and microelements contents on wheat grains of 28-week- old plants.

|    | Optimal irrigation |               | Water stress  |               |
|----|--------------------|---------------|---------------|---------------|
|    | Control            | T140          | Control       | T140          |
| %C | 45.49±0.15 a       | 45.20±0.20 ab | 44.97±0.15 b  | 45.23±0.20 ab |
| %N | 1.45±0.15 b        | 1.60±0.11 ab  | 1.63±0.10 ab  | 1.67±0.09 a   |
| Ca | 0.18±0.02 ab       | 0.19±0.02 a   | 0.13±0.01 c   | 0.15±0.01 bc  |
| K  | 4.83±0.16 a        | 4.87±0.33 a   | 5.24±0.20 a   | 5.02±0.35 a   |
| Mg | 1.48±0.11 a        | 1.56±0.06 a   | 1.48±0.03 a   | 1.53±0.05 a   |
| P  | 4.16±0.33 a        | 4.53±0.18 a   | 4.48±0.17 a   | 4.54±0.14 a   |
| S  | 1.04±0.09 b        | 1.15±0.05 a   | 1.15±0.05 a   | 1.23±0.04 a   |
| B  | 2.02±0.15 a        | 1.57±0.17 b   | 1.66±0.10 b   | 1.32±0.15 c   |
| Cu | 3.73±0.39 b        | 4.24±0.32 b   | 4.38±0.37 b   | 5.27±0.33 a   |
| Fe | 24.30±2.56 b       | 37.89±22.63 a | 24.06±5.45 b  | 39.10±11.55 a |
| Mn | 60.79±6.98 b       | 67.80±6.34 ab | 73.09±3.01 ab | 75.09±3.34 a  |
| Mo | 1.97±0.17 a        | 1.79±0.21 a   | 1.73±0.28 a   | 1.67±0.32 a   |
| Zn | 30.01±1.55 a       | 31.3±1.45 a   | 34.37±4.87 a  | 34.16±3.93 a  |

C and N = %; Ca, K, Mg, P, and S = g/kg of grain; Cu, Fe, Mn, Mo, and Zn = mg/kg of grain. Data are the mean of five samples for each treatment and irrigation condition (n = 5). Values in the same row with different letter are significantly different according to Tukey's test ( $p < 0.05$ ).

**Table S2.** Primers used for real-time quantitative PCR (qPCR) analysis.

| Name        | Sequences (5' → 3')       | Hit description                                                       | Accession Number | References |
|-------------|---------------------------|-----------------------------------------------------------------------|------------------|------------|
| TaNAC2-Fw   | CTGGGTGCTCTGCCGGCTCTA     | NAC2 transcription factor                                             | KY461012         | This work  |
| TaNAC2-Rv   | CTCCGCCTTGGGCTCCATCATC    |                                                                       |                  |            |
| TaDREB2-Fw  | CTCTGAAACGATCAGGCGATGG    | Dehydration-responsive element-binding protein 2 transcription factor | AB193608         | [59]       |
| TaDREB2-Rv  | GTGTATTCTCAGGTCCTCCTTTCC  |                                                                       |                  |            |
| TaDHN16-Fw  | TACGGACAGCAAGGTCATAC      | Dehydrin 16 gene                                                      | X78429           | This work  |
| TaDHN16-Rv  | TCCATGATGCCCTTCTTCTC      |                                                                       |                  |            |
| TaP5CR-Fw   | TGGCTGATGGTGGAGTTG        | Pyrroline-5-carboxylate reductase                                     | AY880317         | This work  |
| TaP5CR-Rv   | GCTGCCCTGGATGTTTAC        |                                                                       |                  |            |
| TaNIA7-Fw   | CTCAAGCGCAGCACGTCTA       | NADH-nitrate reductase                                                | XM_044561748     | [48]       |
| TaNIA7-Rv   | CTCGGACATGGTGAAGTCTGCT    |                                                                       |                  |            |
| TaGS2-Fw    | GATGGAGGTTTCGACGTGAT      | Chloroplastic glutamine-synthetase                                    | DQ124212         | [59])      |
| TaGS2-Rv    | CAAGTCATGGCGAAGTGAAA      |                                                                       |                  |            |
| TaPDR1-Fw   | GAGCAGTATCGTCACGTGTCTGT   | PDR-type ABC transporter                                              | FJ858380         | [48]       |
| TaPDR1-Rv   | TCTGCTGGCCTACGTGGAA       |                                                                       |                  |            |
| TaAMT3.1-Fw | TGGAACGTGGTGGTCACCAGC     | Ammonium transporter 3 member 1-like                                  | XM_044502734     | This work  |
| TaAMT3.1-Rv | AGAGCGCGTAGGCCTCCTCG      |                                                                       |                  |            |
| TaUBQ-Fw    | GCACCTTGGCGGACTACAACATTC  | Ubiquitin (housekeeping gene)                                         | X56803           | This work  |
| TaUBQ-Rv    | ACACCGAAGACGAGACTTGTGAACC |                                                                       |                  |            |

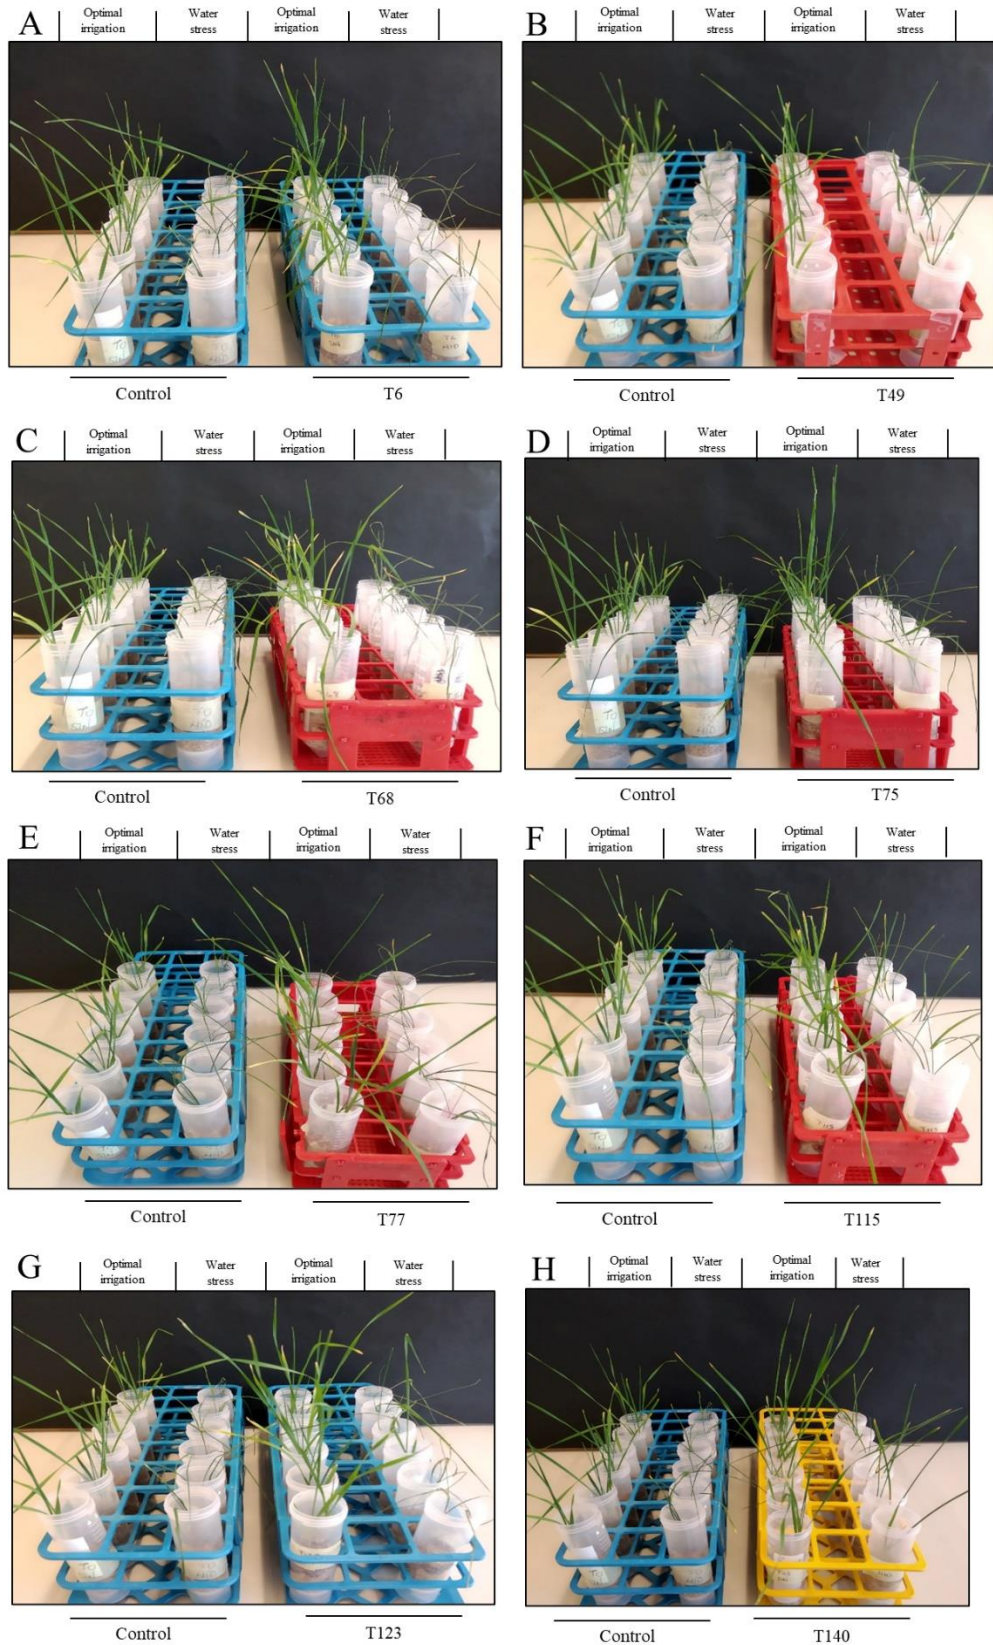

**Figure S1.** Four-week-old wheat seedlings treated with *Trichoderma* spp. and their respective untreated plants (control) subjected to optimal irrigation or water stress (irrigation withdrawn during the third and fourth weeks).

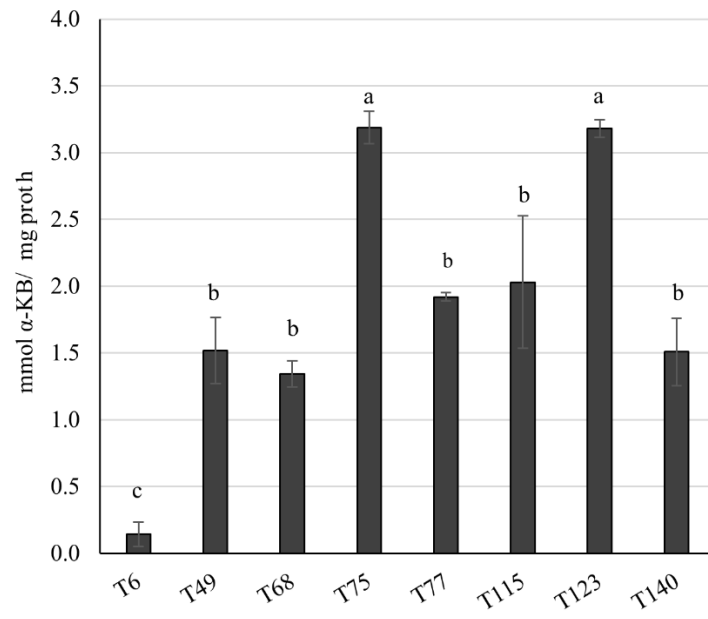

**Figure S2.** ACCD activity in eight *Trichoderma* strains after being grown at 180 rpm and 28°C for 4 days in synthetic minimal medium.
